# Supplementary material for: Intramolecular interaction of NEP regulated by CRM1 ensures the unidirectional transport of M1 for the nuclear export of influenza viral ribonucleoprotein
Source: Frontiers journal article supplement (doi:10.3389/fviro.2023.1232906), 2023-08-17
Supplement: Data_Sheet_1.PDF [file Data_Sheet_1.PDF]

## *Supplementary Material*

### **Intramolecular interaction of NEP regulated by CRM1 ensures the unidirectional transport of M1 for the nuclear export of influenza viral ribonucleoprotein**

**Mikako Hirohama<sup>1</sup>, Shun Yamashita<sup>2</sup>, Masamitsu N. Asaka<sup>1</sup>, Takahiro Kuroki<sup>2</sup>, and Atsushi Kawaguchi<sup>1,2,3,4\*</sup>**

<sup>1</sup>Department of Infection Biology, Faculty of Medicine, University of Tsukuba, Tsukuba, Japan

<sup>2</sup>Graduate School of Comprehensive Human Sciences, University of Tsukuba, Tsukuba, Japan

<sup>3</sup>Transborder Medical Research Center, University of Tsukuba, Tsukuba, Japan

<sup>4</sup>Microbiology Research Center for Sustainability, University of Tsukuba, Tsukuba, Japan

**\* Correspondence:**

Atsushi Kawaguchi

ats-kawaguchi@md.tsukuba.ac.jp

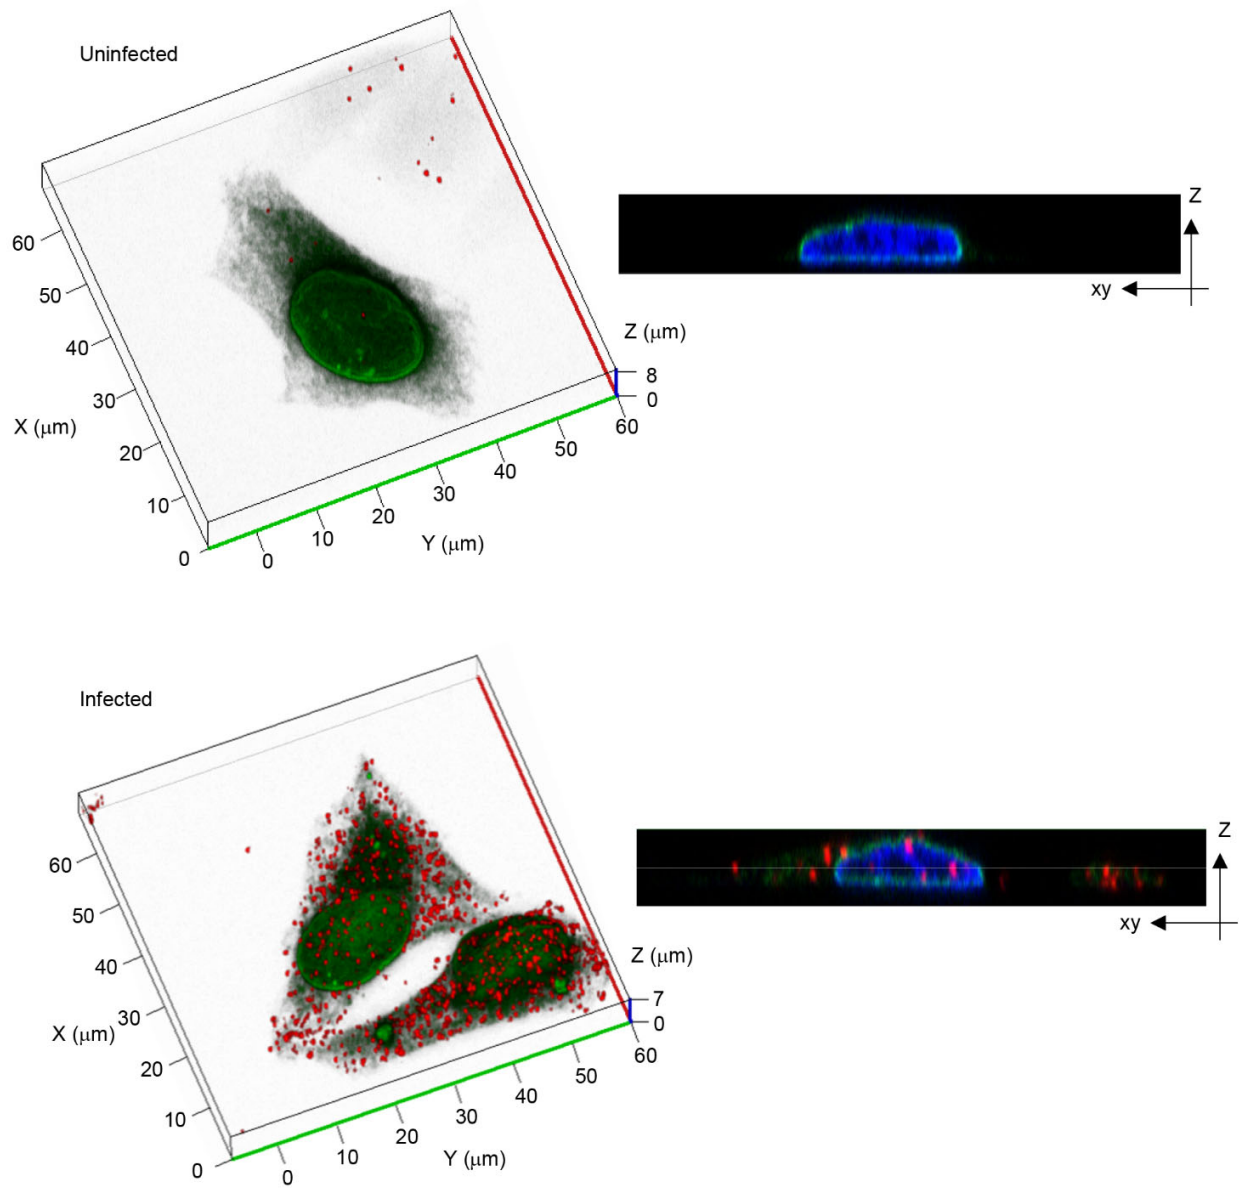

### Supplementary Figure 1

The 3D-reconstruction images of Figure 1B. Samples shown in Figure 1B (0 and 9 h post-infectionFr) were analyzed with ZEN software for 3D reconstruction. The infected HeLa cells expressing GFP-emerin (green) were subjected to *in situ* PLA with rat anti-NEP and rabbit anti-M1 antibodies (red).

|                             |                         |        |          |         |             |              |          |        |           |      |
|-----------------------------|-------------------------|--------|----------|---------|-------------|--------------|----------|--------|-----------|------|
|                             | -53                     |        | -76      |         |             | -106         | -109     | -113   |           | -121 |
| A/Puerto Rico/8/1934 (H1N1) | GDLHSLQNRNEKWREQLGQKFEE | IRWLI  | EEVRHKLK | V-TENSF | -----       | EQITFMQALHLL | LEVEQE   | IRTF   | SFQLI     |      |
| A/Beijing/262/1995 (H1N1)   | GDLHSLQHRNGKWREQLGQKFEE | IRWLI  | EEVRHKLK | T-TENSF | -----       | EQITFMQALQL  | LEVEQE   | IRTF   | SFQLI     |      |
| A/California/7/2009 (H1N1)  | GDLHYLQSRNEKWREQLGQKFEE | IRWLI  | EEVRHRLK | A-TENSF | -----       | EQITFMQALQL  | LEVEQE   | IRAF   | SFQLI     |      |
| A/Perth/16/2009 (H3N2)      | GDLHLLQNRNGKWREQLGQKFEE | IRWLI  | EEVRHRLK | T-TENSF | -----       | EQITFMQALQL  | LEVEQE   | IRTF   | SFQLI     |      |
| A/Hong Kong/156/1997 (H5N1) | GDLHSLQNRNGKWREQLSQKFEE | IRWLI  | EEVRHRLR | I-TENSF | -----       | EQITFMQALQL  | LEVEQE   | IRTF   | SFQLI     |      |
| B/Brisbane/60/2008          | TDY-----                | HQKRET | IRLVTE   | ELYLLSK | RIDDNILFHKT | VIANSSIIADMV | VSLSLLET | LYEMKD | VEVYSRQCL |      |

## Supplementary Figure 2

The sequence alignment of NEP between H1N1, H3N2, H5N1 influenza A viruses and influenza B virus. Amino acid residues 53 to 121 of A/Puerto Rico/8/1934 (H1N1) NEP are aligned with that of A/Beijing/262/1995 (H1N1), A/California/7/2009 (H1N1), A/Perth/16/2009 (H3N2), A/Hong Kong/156/1997 (H5N1), and B/Brisbane/60/2008. Conserved residues are shown in yellow boxes. The amino acid positions 76, 106, 109, and 113 are shown in red.
